# Supplementary material for: Comprehensive Identification of Trem2 as a Key Factor in Promoting the Progression of Hepatocellular Carcinoma and Predicting Prognosis
Source: Research Square preprint supplement (doi:10.21203/rs.3.rs-835818/v1), 2021-09-16
Supplement: Supplementary file 1 [file f68dffae1ff8ee9d09b5a57c.xlsx]

## Sheet: Sheet1
Name	ES
ACSL3	-0.126548
ACOX3	-0.259457
ACSL4	-0.379771
CPT1C	-0.399107
CPT1B	-0.422865
HADHA	-0.437106
ACAT2	-0.800637
ADH7	-0.823396
HADHB	-0.843545
ACADVL	-0.850169
ECI1	-0.857101
ACADS	-0.84443
CPT1A	-0.834796
ACAT1	-0.822479
ACAA2	-0.80693
ALDH7A1	-0.790994
ALDH1B1	-0.773405
ALDH3A2	-0.751947
ACSL1	-0.729545
ACADM	-0.707485
CPT2	-0.684606
ADH1C	-0.661396
ECHS1	-0.637759
ADH5	-0.613858
CYP4A11	-0.587724
ALDH9A1	-0.560029
ACOX1	-0.532316
CYP4A22	-0.50318
ADH1A	-0.474036
